# Supplementary material for: Bioconjugates of photon-upconversion nanoparticles for cancer biomarker detection and imaging
Source: Springer Nature journal article supplement (doi:10.1038/s41596-021-00670-7), 2022-02-18
Supplement: MOESM3 [file 41596_2021_670_MOESM3_ESM28.xlsx]

## Sheet: Sheet1
Computation for preparing photon-upconversion nanoparticles with carboxylated silica shell
Set the values in the green cells
	Nanoparticle diameter less than 60 nm	Nanoparticle diameter from 60 to 100 nm	Nanoparticle diameter more than 100 nm
Nanoparticle diameter (nm)	50	75	120
Nanoparticle mass (mg)	30	10	10
Nanoparticle dispersion volume (mL)	2	0.5	0.5
Igepal CO-520 (g)	0.611239	0.135831	0.169789
Cyclohexane (mL)	5.75069	1.22237	1.65297
Tetraethyl orthosilicate (the first addition; µL)	34.0393	7.56428	9.45535
NH4OH 12.5% (uL)	37.4439	16.6417	20.8021
Tetraethyl orthosilicate (the second addition; µL)	8.584	1.90756	2.38444
Carboxyethylsilanetriol, disodium salt, 25% in water (µL)	17.168	3.81511	4.76889
